# Supplementary material
Source: PubMed Central journal article supplement (PMC3048158)
Supplement: 1015406108_pnas.201015406SI.pdf [file 1015406108_pnas.201015406SI.pdf]

# Supporting Information

Franklin et al. 10.1073/pnas.1015406108

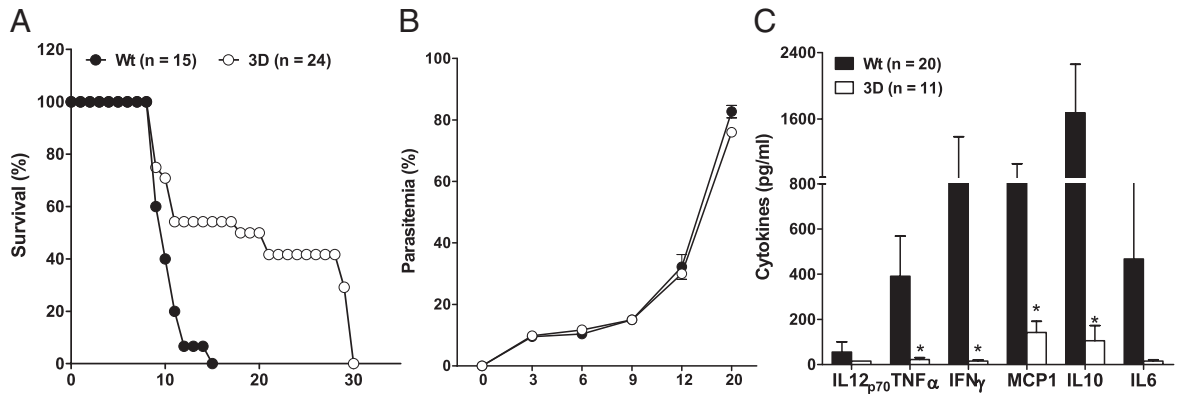

**Fig. S1.** TLR7 and TLR9 are key mediators of ECM. WT mice or mice with disruption in UNC93B1 (3d) were infected with  $10^5$  *PbA* iRBCs. Survival (A) and parasitemia (B) were compared between groups of mice at various days postinfection. (C) Cytokine levels in sera were assessed after 7 d postinfection using the CBA inflammation kit (Becton–Dickinson). Data are from a sum of three different experiments that yielded similar results. The Mann–Whitney *U* test was used to compare means between cytokine levels detected in the vehicle-treated or E6446-treated group of mice. A *P* value <0.05 was considered to be statistically significant.

**Table S1. Dose–response experiments to evaluate E6446 effectiveness in vivo**

| Drug            | pg/mL serum IL-6 at 2 h postchallenge |              |
|-----------------|---------------------------------------|--------------|
|                 | Experiment 1                          | Experiment 2 |
| E6446, 60 mg/kg | 16 ± 29                               | 37 ± 21      |
| E6446, 20 mg/kg | 121 ± 23                              | 111 ± 27     |
| Vehicle         | 162 ± 41                              | 150 ± 33     |
